# Supplementary material
Source: publisher figshare collection journal article supplement (https://tandf.figshare.com/articles/dataset/_/6632936)
Supplement: Supplementary file 1 [file 1]

Table 1 Supplementary. Baseline characteristics and risk factors for preterm birth in women with singleton pregnancies undergoing cerclage, based on Body Mass Index (BMI).

| Variables                                 | Overall    | BMI Classification |                        |                     |          |
|-------------------------------------------|------------|--------------------|------------------------|---------------------|----------|
|                                           |            | Normal<br>(n = 16) | Overweight<br>(n = 35) | Obese<br>(n = 44)   | <i>p</i> |
| Maternal age (years)                      | 30.1 ± 0.7 | 30.1 ± 2.1         | 29.7 ± 1.1             | 30.5 ± 0.9          | 0.85     |
| Race/Ethnicity                            |            |                    |                        |                     | <0.01    |
| Black                                     | 48 (50.5)  | 4 (25.0)           | 12 (34.3)              | 32 (72.7)           |          |
| Hispanic                                  | 25 (26.3)  | 4 (25.0)           | 12 (34.3)              | 9 (20.5)            |          |
| White                                     | 12 (12.6)  | 6 (37.5)           | 4 (11.4)               | 2 (4.6)             |          |
| Other                                     | 10 (10.5)  | 2 (12.5)           | 7 (20.0)               | 1 (2.3)             |          |
| Marital Status                            |            |                    |                        |                     | 0.48     |
| Married                                   | 45 (47.4)  | 8 (50.0)           | 19 (54.3)              | 18 (40.9)           |          |
| Other                                     | 50 (52.6)  | 8 (50.0)           | 16 (45.7)              | 26 (59.1)           |          |
| Primigravida                              | 11 (11.6)  | 1 (6.3)            | 5 (14.3)               | 5 (11.4)            | 0.71     |
| Previous preterm birth                    | 60 (63.2)  | 13 (81.3)          | 22 (62.9)              | 25 (56.8)           | 0.22     |
| Previous loss at 16 to 24 weeks           | 58 (63.7)  | 8 (50.0)           | 21 (60.0)              | 29 (72.5)<br>(n=40) | 0.24     |
| Previous cone biopsy                      | 13 (13.8)  | 2 (12.5)           | 8 (23.5)<br>(n=34)     | 3 (6.8)             | 0.1      |
| Previous cerclage                         | 26 (27.7)  | 6 (37.5)           | 10 (28.6)              | 10 (23.3)<br>(n=43) | 0.55     |
| Gestational age at cerclage (weeks)       | 16.5 ± 0.3 | 15.9 ± 0.6         | 16.6 ± 0.6             | 16.7 ± 0.5          | 0.66     |
| Cervical length < 25 mm prior to cerclage | 30 (40.0)  | 2 (14.3)<br>(n=14) | 10 (41.7)<br>(n=24)    | 18 (48.7)<br>(n=37) | 0.08     |

Data are presented as mean ± SE and number (percent) where applicable.
