# Supplementary material
Source: publisher figshare collection journal article supplement (https://tandf.figshare.com/articles/dataset/_/6632936)
Supplement: Supplementary file 2 [file 1]

Table 2 Supplementary. Pregnancy outcomes in women with singleton pregnancies undergoing cerclage, based on Body Mass Index (BMI).

| Variables                                   | Overall        | BMI Classification   |                        |                      |          |
|---------------------------------------------|----------------|----------------------|------------------------|----------------------|----------|
|                                             |                | Normal<br>(n = 16)   | Overweight<br>(n = 35) | Obese<br>(n = 44)    | <i>p</i> |
| Gestational age at cerclage removal (weeks) | 34.0 ± 0.5     | 36.5 ± 0.2<br>(n=13) | 35.0 ± 0.6<br>(n=33)   | 32.1 ± 1.0<br>(n=40) | <0.01    |
| Gestational age at delivery (weeks)         | 35.3 ± 0.6     | 39.0 ± 0.3           | 36.6 ± 0.7             | 33.0 ± 1.1           | <0.01    |
| Cerclage-to-delivery (days)                 | 131.6 ± 4.8    | 161.5 ± 5.2          | 139.6 ± 6.2<br>(n=34)  | 114.4 ± 8.0          | <0.01    |
| Delivery ≥ 37 weeks                         | 60 (63.2)      | 15 (93.8)            | 23 (65.7)              | 22 (50.0)            | <0.01    |
| Delivery ≥ 35 weeks                         | 70 (73.7)      | 16 (100)             | 29 (82.9)              | 25 (56.8)            | <0.01    |
| Delivery ≥ 32 weeks                         | 75 (79.0)      | 16 (100)             | 31 (88.6)              | 28 (63.6)            | <0.01    |
| PPROM                                       | 21 (22.3)      | 0 (0)                | 8 (22.9)               | 13 (30.2)<br>(n=43)  | 0.05     |
| Chorioamnionitis                            | 15 (16.0)      | 0 (0)                | 4 (11.4)               | 11 (25.6)            | 0.04     |
| Cesarean delivery                           | 39 (41.1)      | 1 (6.3)              | 18 (51.4)              | 20 (45.5)            | <0.01    |
| Birth weight (grams)                        | 2752.0 ± 108.1 | 3238.4 ± 106.0       | 2957.0 ± 148.0         | 2395.8 ± 187.6       | <0.01    |
| Perinatal deaths                            | 3 (3.2)        | 0 (0)                | 0 (0)                  | 3 (6.8)              | 0.17     |
| NICU admission                              | 22 (23.7)      | 0 (0)                | 7 (20.6)<br>(n=34)     | 15 (34.9)            | 0.02     |

Data are presented as mean ± SE and number (percent) where applicable. PPRM, preterm premature rupture of membranes.
